# Supplementary material
Source: Springer Nature journal article supplement (https://www.springermedizin.de/resource/supplementary/12876_2010_543_MOESM2_ESM.pdf/9437376)

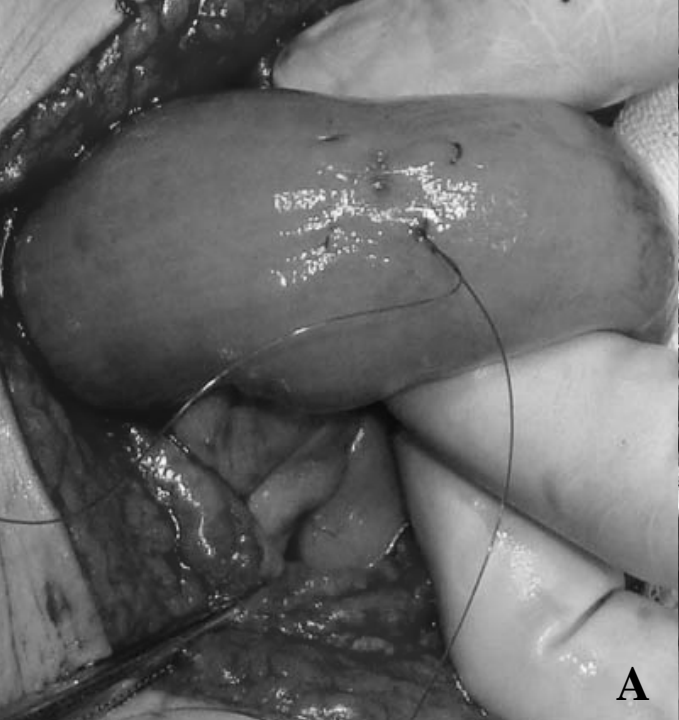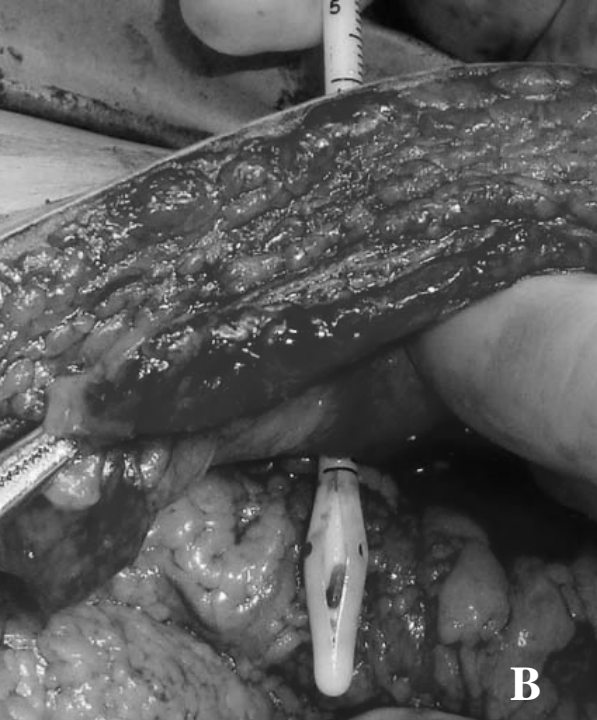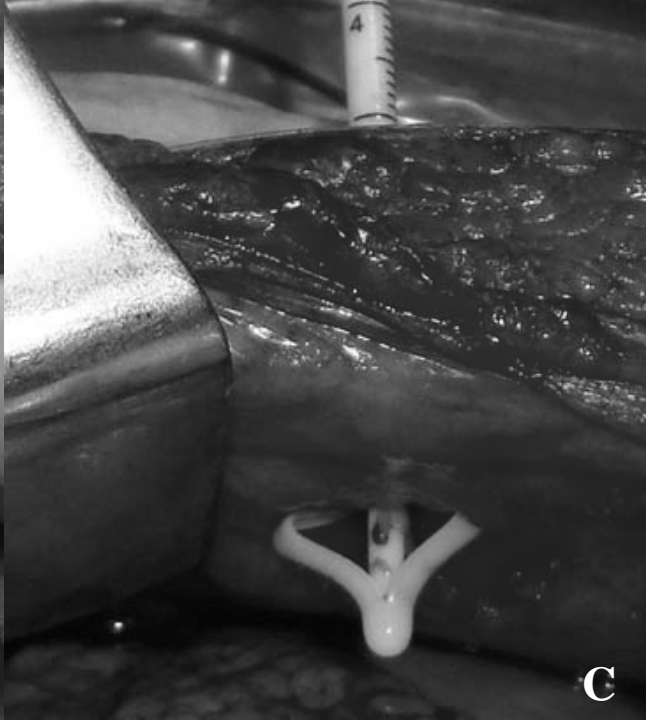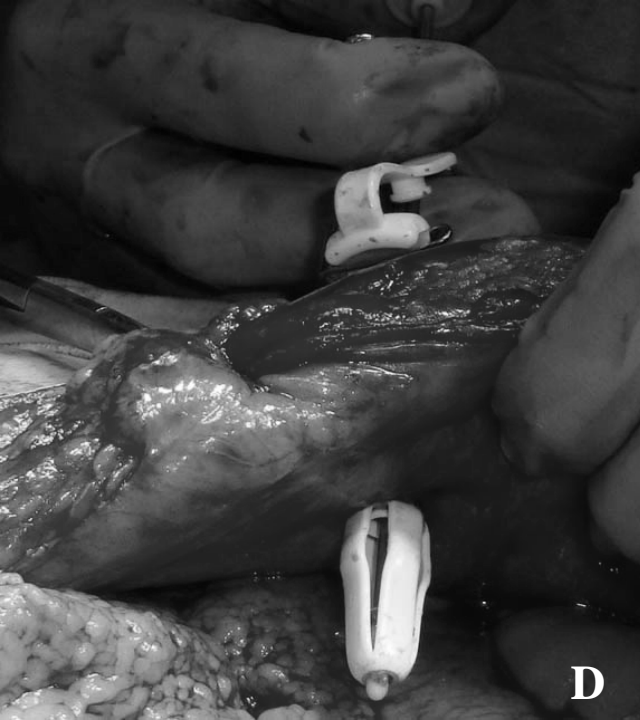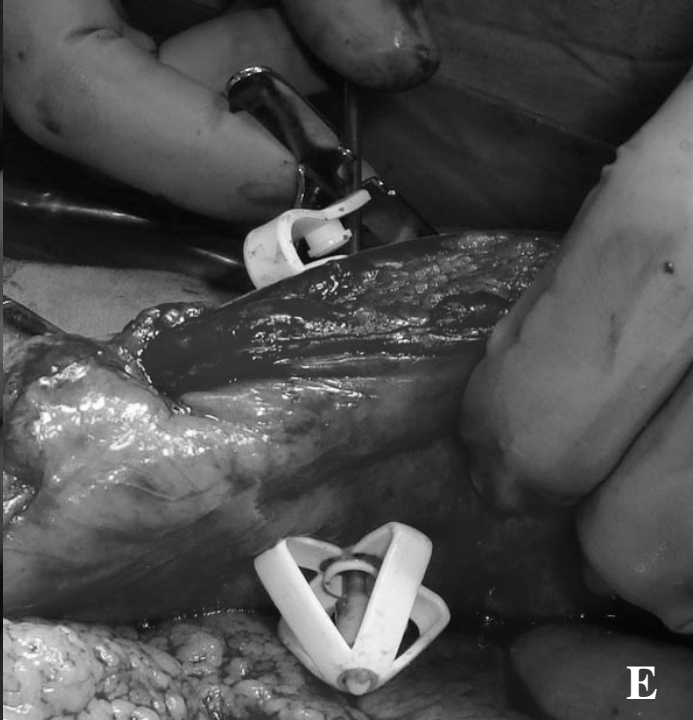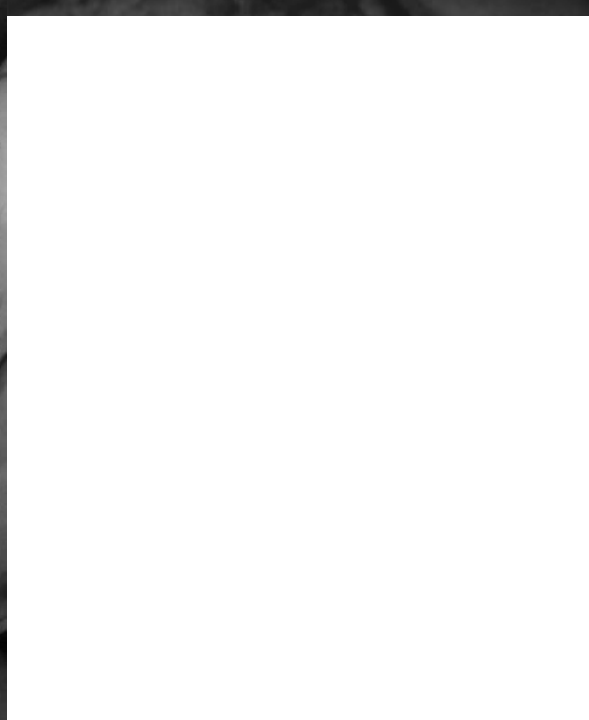

Supplement: MOESM2 [file 9437376]
